# Supplementary material for: Effect of Exercise on Vascular Function and Blood Lipids in Postmenopausal Women: A Systematic Review and Network Meta-Analysis
Source: MDPI journal article supplement (doi:10.3390/ijerph191912074), 2022-09-23

## Supplementary Material

| <b>Content</b>                                                                    | <b>Pages</b> |
|-----------------------------------------------------------------------------------|--------------|
| <b>Table S1. Search strategy.</b>                                                 | <b>2</b>     |
| <b>Table S2. Basic Information of the Included Studies</b>                        | <b>3-4</b>   |
| <b>Table S3. Exercise Intervention and Outcome Index of the Included Studies</b>  | <b>5-7</b>   |
| <b>Figure S1. Cochrane risk bias evaluation chart.</b>                            | <b>8</b>     |
| <b>Figure S2-8. Pairwise Meta-Analysis.</b>                                       | <b>9-11</b>  |
| <b>Figure S9-14. Ranking of exercise interventions in order of effectiveness.</b> | <b>12-13</b> |
| <b>Figure S15-20. Publication Bias or Small Sample Effect Test</b>                | <b>14-15</b> |

**Table S1 Search strategy for Pubmed**

|               | Search strategy                                                                                                                                                                                                                                                                                                                                                                                                                                                                                                                                                                                                                                                                                                                                                                                                                                                                                                                                                                                      |
|---------------|------------------------------------------------------------------------------------------------------------------------------------------------------------------------------------------------------------------------------------------------------------------------------------------------------------------------------------------------------------------------------------------------------------------------------------------------------------------------------------------------------------------------------------------------------------------------------------------------------------------------------------------------------------------------------------------------------------------------------------------------------------------------------------------------------------------------------------------------------------------------------------------------------------------------------------------------------------------------------------------------------|
| <b>Pubmed</b> | <p> ((((((((Menopausal women[Title/Abstract]) OR (postmenopausal women[Title/Abstract])) OR (postmenopausal female[Title/Abstract])) OR (menopause female[Title/Abstract])) OR (elderly women[Title/Abstract])) OR (older adults[Title/Abstract])) OR (postmenopausal females[Title/Abstract])) AND (((((((cardiovascular[Title/Abstract]) OR (flow-mediated dilation[Title/Abstract])) OR (pulse wave velocity[Title/Abstract])) OR (intima media thickness[Title/Abstract])) OR (vascular function[Title/Abstract])) OR (total cholesterol[Title/Abstract])) OR (triglyceride[Title/Abstract])) AND (((((((Exercise[Title/Abstract]) OR (physical activit*[Title/Abstract])) OR (training*[Title/Abstract])) OR (resistance training[Title/Abstract])) OR (aerobic exercise[Title/Abstract])) OR (combined training[Title/Abstract])) OR (water exercise[Title/Abstract])) AND (((randomized controlled trial[Title/Abstract]) OR (randomized[Title/Abstract])) OR (placebo[Title/Abstract])) </p> |

**Table S2 Basic Information of the Included Studies**

| Study        | Country | Group | Age ( Mean $\pm$ SD )  | n  |
|--------------|---------|-------|------------------------|----|
| James1991    | USA     | AE    | 47 $\pm$ 2 years       | 11 |
|              |         | RT    | 47 $\pm$ 2 years       | 12 |
| Casey2007    | USA     | AE    | 59.7 $\pm$ 6.5 years   | 10 |
|              |         | RT    | 58.7 $\pm$ 4.5 years   | 13 |
| Zois2009     | Greece  | CT    | 55.0 $\pm$ 5.2 years   | 10 |
|              |         | CON   | 59.4 $\pm$ 3.2 years   | 10 |
| Arturo2011   | USA     | CT    | 54 $\pm$ 2years        | 12 |
|              |         | CON   | 54 $\pm$ 1 years       | 12 |
| Masanori2012 | Japan   | AE    | 72 $\pm$ 4.2 years     | 13 |
|              |         | CON   | 71.5 $\pm$ 7.4 years   | 13 |
| Nihal2012    | Turkey  | RT    | 54.33 $\pm$ 5.3 years  | 24 |
|              |         | CON   | 51.80 $\pm$ 3.65 years | 21 |
| Asako2012    | Japan   | AE    | 60 $\pm$ 6 years       | 11 |
|              |         | CON   | 60 $\pm$ 7 years       | 11 |
| Katie2012    | USA     | CT1   | 65.6 $\pm$ 0.7 years   | 27 |
|              |         | CT2   | 63.7 $\pm$ 0.5 years   | 30 |
|              |         | CT3   | 64.8 $\pm$ 0.7 years   | 22 |
| Figueroa2012 | USA     | RT    | 56 $\pm$ 3 years       | 15 |
|              |         | CON   | 56 $\pm$ 3 years       | 13 |
| Gerage2013   | Brazil  | RT    | 65.5 $\pm$ 5.0 years   | 15 |
|              |         | CON   | 66.2 $\pm$ 4.1 years   | 14 |
| Cleiton2014  | Brazil  | RT1   |                        | 12 |
|              |         | RT2   | 59.5 $\pm$ 6.3years    | 11 |
|              |         | CON   |                        | 12 |
| Dos2014      | Brazil  | CT1   | 64.2 $\pm$ 3.1 years   | 20 |
|              |         | CT2   | 62.6 $\pm$ 2.5 years   | 20 |
|              |         | CON   | 63.1 $\pm$ 2.3 years   | 20 |
| Camilla2016  | Danmark | AE    | 53.4 $\pm$ 3 years     | 38 |
| Nishida2015  | Japan   | AE    | 70.4 $\pm$ 5.8 years   | 31 |
|              |         | CON   | 69.7 $\pm$ 6.6 years   | 31 |
| Wong2016     | USA     | RT    | 59 $\pm$ 1 years       | 13 |
|              |         | CON   | 58 $\pm$ 1 years       | 12 |
| Azadpour2017 | Turkey  | AE    | 57.58 $\pm$ 4.29 years | 12 |
|              |         | CON   | 56.58 $\pm$ 4.17 years | 12 |
| Jinkee2017   | Japan   | CT    | 73.5 $\pm$ 7.1 years   | 25 |
|              |         | CON   | 74.7 $\pm$ 5.1 years   | 25 |
| Won2017      | Korea   | CT    | 76 $\pm$ 5 years       | 10 |
|              |         | CON   | 74.7 $\pm$ 2 years     | 10 |
| Anahita2018  | Iran    | CT    | 54.83 $\pm$ 4.72 years | 12 |
|              |         | CON   | 56.9 $\pm$ 4.93 years  | 12 |

|               |           |     |                    |    |
|---------------|-----------|-----|--------------------|----|
| Alexei2018    | Korea     | RT  | 59±1 years         | 20 |
|               |           | CON | 59±1 years         | 21 |
| Wong2018      | Korea     | WE  | 74±4 years         | 52 |
|               |           | CON | 73±4 years         | 48 |
| Tze2019       | Australia | AE  | 53.9±3.39 years    | 30 |
|               |           | CON | 53.2±3.07 years    | 30 |
|               |           | AE1 | 61.8±10.1 years    | 21 |
| Eun2019       | Korea     | AE2 | 57.3±8.4 years     | 13 |
|               |           | CON | 62.5±13.9 years    | 13 |
| Paolo2019     | Brazil    | RT  | 71.40 ± 5.71 years | 25 |
|               |           | CON | 69.04 ± 4.45 years | 23 |
|               |           | RT1 |                    | 20 |
| Leandro2020   | Brazil    | RT2 | 67.3 ± 4.4 years   | 20 |
|               |           | CON |                    | 19 |
| Won2020       | Korea     | RT  | 67.4 ± 1.1 years   | 10 |
|               |           | CON | 67.7 ± 1.0 years   | 10 |
| HuiHe2022     | China     | AE  | 58.3 ± 3.0 years   | 15 |
|               |           | CON | 57.6 ± 3.2 years   | 14 |
| Arca2014      | Brazil    | WE  | 64 ± 7.0 years     | 19 |
|               |           | CON |                    | 14 |
| Colado2009    | Spain     | WE  | 54.7±2.0 years     | 15 |
|               |           | RT  | 54.0±2.8 years     | 21 |
|               |           | CON | 52.9±1.9 years     | 10 |
| Woo2016       | Korea     | WE  | 73.22±3.30 years   | 25 |
|               |           | CON | 72.65±4.28 years   | 15 |
| Sattar2012    | Iran      | WE  | 55.2 ± 3.7 years   | 14 |
|               |           | CON | 54.4 ± 4.6 years   | 10 |
| Pak2014       | China     | WE  | 69.4 ± 7.19 years  | 13 |
|               |           | CON | 74.6 ± 6.52 years  | 10 |
| Rodrigo2008   | Australia | WE  | 53.1±1.9 years     | 36 |
|               |           | CON | 54.3±2.5 years     | 22 |
| Takeshima2002 | Japan     | WE  | 69.3±4.5 years     | 15 |
|               |           | CON | 69.3±3.3 years     | 15 |
|               |           | WE  | 66.77±3.07 years   | 14 |
| Kim2018       | Korea     | AE  | 67.42±1.78 years   | 14 |
|               |           | CON | 66.43±4.45 years   | 12 |
| Kim2021       | Korea     | WE  | 74.36 ± 3.78 years | 12 |
|               |           | CON | 75.90 ± 4.23 years | 10 |
| Arturo2013    | USA       | RT  | 54 ±1 years        | 14 |
| Jeon2018      | Korea     | CT  | 59 ±1 years        | 8  |
|               |           | CON | 58 ±2 years        | 8  |

**Abbreviations:** AE, aerobic exercise; RT, resistance training; CT, combined training; WE, water exercise; CON, control group.

**Table S3 Exercise Intervention and Outcome Index of the Included Studies**

| Study        | Group | Intervening measure and intensity                                                                 | Intervention duration (minutes per session, times per week, total weeks) | Outcome Index                 |
|--------------|-------|---------------------------------------------------------------------------------------------------|--------------------------------------------------------------------------|-------------------------------|
| James1991    | AE    | running; 70%HRR                                                                                   | 50 min, 3d/w, 12w                                                        | TC、TG、LDL-C、HDL-C             |
|              | RT    | 65-70% 1RM                                                                                        | 55 min, 3d/w, 12w                                                        |                               |
| Casey2007    | AE    | running; 65-80%HRR                                                                                | 40 min, 2d/w, 18w                                                        | SBP、DBP                       |
|              | RT    | 65-70% 1RM                                                                                        | 35 min, 2d/w, 18w                                                        |                               |
| Zois2009     | CT    | 60% 1RM for RT+70% HRmax for AE                                                                   | 75 min, 2d/w, 16w                                                        | TC、TG、LDL-C、HDL-C             |
|              | CON   | No exercise                                                                                       |                                                                          |                               |
| Arturo2011   | CT    | 60% 1RM for RT+60% HRmax for AE                                                                   | 40 min, 3d/w, 12w                                                        | SBP、DBP、PWV                   |
|              | CON   | No exercise                                                                                       |                                                                          |                               |
| Masanori2012 | AE    | 15RPE                                                                                             | 20min, 7d/w, 12w                                                         | TC、TG、LDL-C、HDL-C、SBP、DBP、PWV |
|              | CON   | No exercise                                                                                       |                                                                          |                               |
| Nihal2012    | RT    | 60% 1RM                                                                                           | 50min, 3d/w, 12w                                                         | TC、TG、LDL-C、HDL-C、SBP、DBP、    |
|              | CON   | No exercise                                                                                       |                                                                          |                               |
| Asako2012    | AE    | walking/cycling; 70%HRR                                                                           | 45min, 3d/w, 8w                                                          | TC、TG、LDL-C、HDL-C、SBP、DBP、    |
|              | CON   | No exercise                                                                                       |                                                                          |                               |
| Katie2012    | CT1   | 80% 1RM for RT+70% HRmax for AE                                                                   | 45min, 1d/w, 16w                                                         | SBP、DBP                       |
|              | CT2   |                                                                                                   | 45min, 2d/w, 16w                                                         |                               |
|              | CT3   |                                                                                                   | 45min, 3d/w, 16w                                                         |                               |
| Figueroa2012 | RT    | 80% 1RM                                                                                           | 3d/w, 6w                                                                 | SBP、DBP                       |
|              | CON   | No exercise                                                                                       |                                                                          |                               |
| Gerage2013   | RT    | 65% 1RM                                                                                           | 30min, 3d/w, 12w                                                         | SBP、DBP                       |
|              | CON   | No exercise                                                                                       |                                                                          |                               |
| Cleiton2014  | RT1   | 65% 1RM                                                                                           | 20min, 3d/w, 12w                                                         | TC、LDL-C、HDL-C                |
|              | RT2   |                                                                                                   | 40min, 3d/w, 12w                                                         |                               |
|              | CON   |                                                                                                   | No exercise                                                              |                               |
| Dos2014      | CT    | 75% 1RM for RT+65-75% HRmax for AE                                                                | 50min, 3d/w, 16w                                                         | SBP、DBP                       |
|              | CON   | No exercise                                                                                       |                                                                          |                               |
| Camilla2016  | AE    | cycling                                                                                           | 60min, 3d/w, 12w                                                         | TC、TG、LDL-C、HDL-C、            |
| Nishida2015  | AE    | stair stepping                                                                                    | 20min, 7d/w, 12w                                                         | TC、TG、LDL-C、HDL-C、SBP、DBP、    |
|              | CON   | No exercise                                                                                       |                                                                          |                               |
| Wong2016     | RT    | whole body vibration training                                                                     | 60min, 3d/w, 8w                                                          | SBP、DBP                       |
|              | CON   | No exercise                                                                                       |                                                                          |                               |
| Azadpour2017 | AE    | running; 1-2 weeks, 50% HRmax ; 3-4 weeks, 55% HRmax; 5-6 weeks, 60% HRmax; 7-10weeks, 60% HRmax; | 40min, 3d/w, 10w                                                         | SBP、DBP                       |
|              | CON   | No exercise                                                                                       |                                                                          |                               |
| Jinkee2017   | CT    | walking+elastic bands; 13-17RPE                                                                   | 80min,5d/w, 24w                                                          | TC、TG、LDL-C、HDL-C、SBP、DBP     |
|              | CON   | No exercise                                                                                       |                                                                          |                               |
| Won2017      | CT    | running+RT; 1-4 weeks, 50% HRR ; 5-8weeks, 60% HRR; 9-12 weeks, 70% HRR;                          | 70min,3d/w, 12w                                                          | SBP、DBP、PWV                   |
|              | CON   | No exercise                                                                                       |                                                                          |                               |

|               |                   |                                                                                                                 |                     |                                           |
|---------------|-------------------|-----------------------------------------------------------------------------------------------------------------|---------------------|-------------------------------------------|
| Anahita2018   | CT<br>CON         | 50-75% 1RM for RT+50-75%<br>HRmax for AE<br>No exercise                                                         | 90min,3d/w, 8w      | TC、TG、LDL-C、<br>HDL-C、<br>SBP、DBP         |
| Alexei2018    | RT<br>CON         | 13RPE<br>No exercise                                                                                            | 2-4d/w,12w          | SBP、DBP、<br>PWV                           |
| Wong2018      | WE<br>CON         | swimming; 1-5 weeks, 60%<br>HRmax ;6-20 weeks, 70-75%<br>HRmax;<br>No exercise                                  | 30min,3-4d/w, 20w   | SBP、DBP、<br>PWV                           |
| Tze2019       | AE<br>CON         | cycling; 13-14 RPE<br>No exercise                                                                               | 30min,3d/w, 8w      | TC、TG、LDL-C、<br>HDL-C、<br>SBP、DBP、<br>PWV |
| Eun2019       | AE1<br>AE2<br>CON | running; 40-80% HRmax<br>running/walking; 60-80% HRmax<br>No exercise                                           | 50min,7d/w,12w      | SBP、DBP                                   |
| Paolo2019     | RT<br>CON         | 65-75% 1RM<br>No exercise                                                                                       | 20min,3d/w,12w      | TC、TG、LDL-C、<br>HDL-C、                    |
| Leandro2020   | RT1<br>RT2<br>CON | 65-80% 1RM<br>60-85%1RM<br>No exercise                                                                          | 3d/w,8w             | TC、TG、LDL-C、<br>HDL-C、                    |
| Won2020       | RT<br>CON         | elastic bands; 1-4 weeks, 40-50%<br>1RM ;5-8 weeks, 50-60%1RM; 9-<br>12 weeks, 60-70%1RM<br>No exercise         | 60min,3d/w,12w      | SBP、DBP                                   |
| HuiHe2022     | AE<br>CON         | running; 40%HRR<br>No exercise                                                                                  | 50min,5d/w,12w      | TC、TG、LDL-C、<br>HDL-C、<br>SBP、DBP         |
| Arca2014      | WE<br>CON         | walking; 40-50%HRR<br>No exercise                                                                               | 50min,3d/w,12w      | TC、TG、LDL-C、<br>HDL-C、<br>SBP、DBP         |
| Colado2009    | WE<br>RT<br>CON   | RT<br>elastic bands<br>No exercise                                                                              | 35-60min,2-3d/w,24w | TC、TG、LDL-C、<br>HDL-C、<br>SBP、DBP         |
| Woo2016       | WE<br>CON         | 60-80% HRmax<br>No exercise                                                                                     | 50min,3d/w,12w      | TC、TG、LDL-C、<br>HDL-C、<br>SBP、DBP         |
| Sattar2012    | WE<br>CON         | RT<br>No exercise                                                                                               | 45-60min, 3d/w,8w   | SBP                                       |
| Pak2014       | WE<br>CON         | Taichi<br>No exercise                                                                                           | 60min,3d/w,8w       | TG、LDL-C、<br>HDL-C、 SBP、<br>DBP           |
| Rodrigo2008   | WE<br>CON         | RT<br>No exercise                                                                                               | 2d/w,12w            | TC、TG、LDL-C、<br>HDL-C                     |
| Takeshima2002 | WE<br>CON         | walking +RT; 60-80% HRmax<br>No exercise                                                                        | 70min,3d/w,12w      | TC、TG、LDL-C、<br>HDL-C、                    |
| Kim2018       | WE<br>AE<br>CON   | 1-4weeks 40%-50%HRR;5-8weeks<br>50%-60% HRR; 9-12weeks 60%-<br>65% HRR;13-16weeks 65%-70%<br>HRR<br>No exercise | 60min,2d/w,16w      | PWV                                       |
| Kim2021       | WE<br>CON         | 1-4weeks 9-10RPE;5-8weeks 11-<br>12RPE; 9-12weeks 13-14RPE<br>No exercise                                       | 60min,3d/w,12w      | TC、LDL-C、<br>HDL-C                        |
| Arturo2013    | RT                | 60% 1RM                                                                                                         | 3d/w,12w            | SBP、DBP                                   |
| Jeon2018      | CT<br>CON         | walking + RT; 60- 80% HRmax<br>No exercise                                                                      | 60min,3d/w,12w      | SBP 、DBP、<br>TC、TG、PWV                    |

**Abbreviations:** AE, aerobic exercise; RT, resistance training; CT, combined training; WE, water exercise; CON, control group; HRR, heart rate reserve; HRmax, maximal heart rate; RM, repetition maximum; RPE, Rating of perceived exertion; TC, total cholesterol; TG, triglyceride; LDL-C, low density lipoprotein cholesterol; HDL-C, high density lipoprotein cholesterol; SBP, systolic blood pressure; DBP, diastolic blood pressure; PWV, pulse wave velocity.

**Figure S1** Cochrane risk bias evaluation chart.

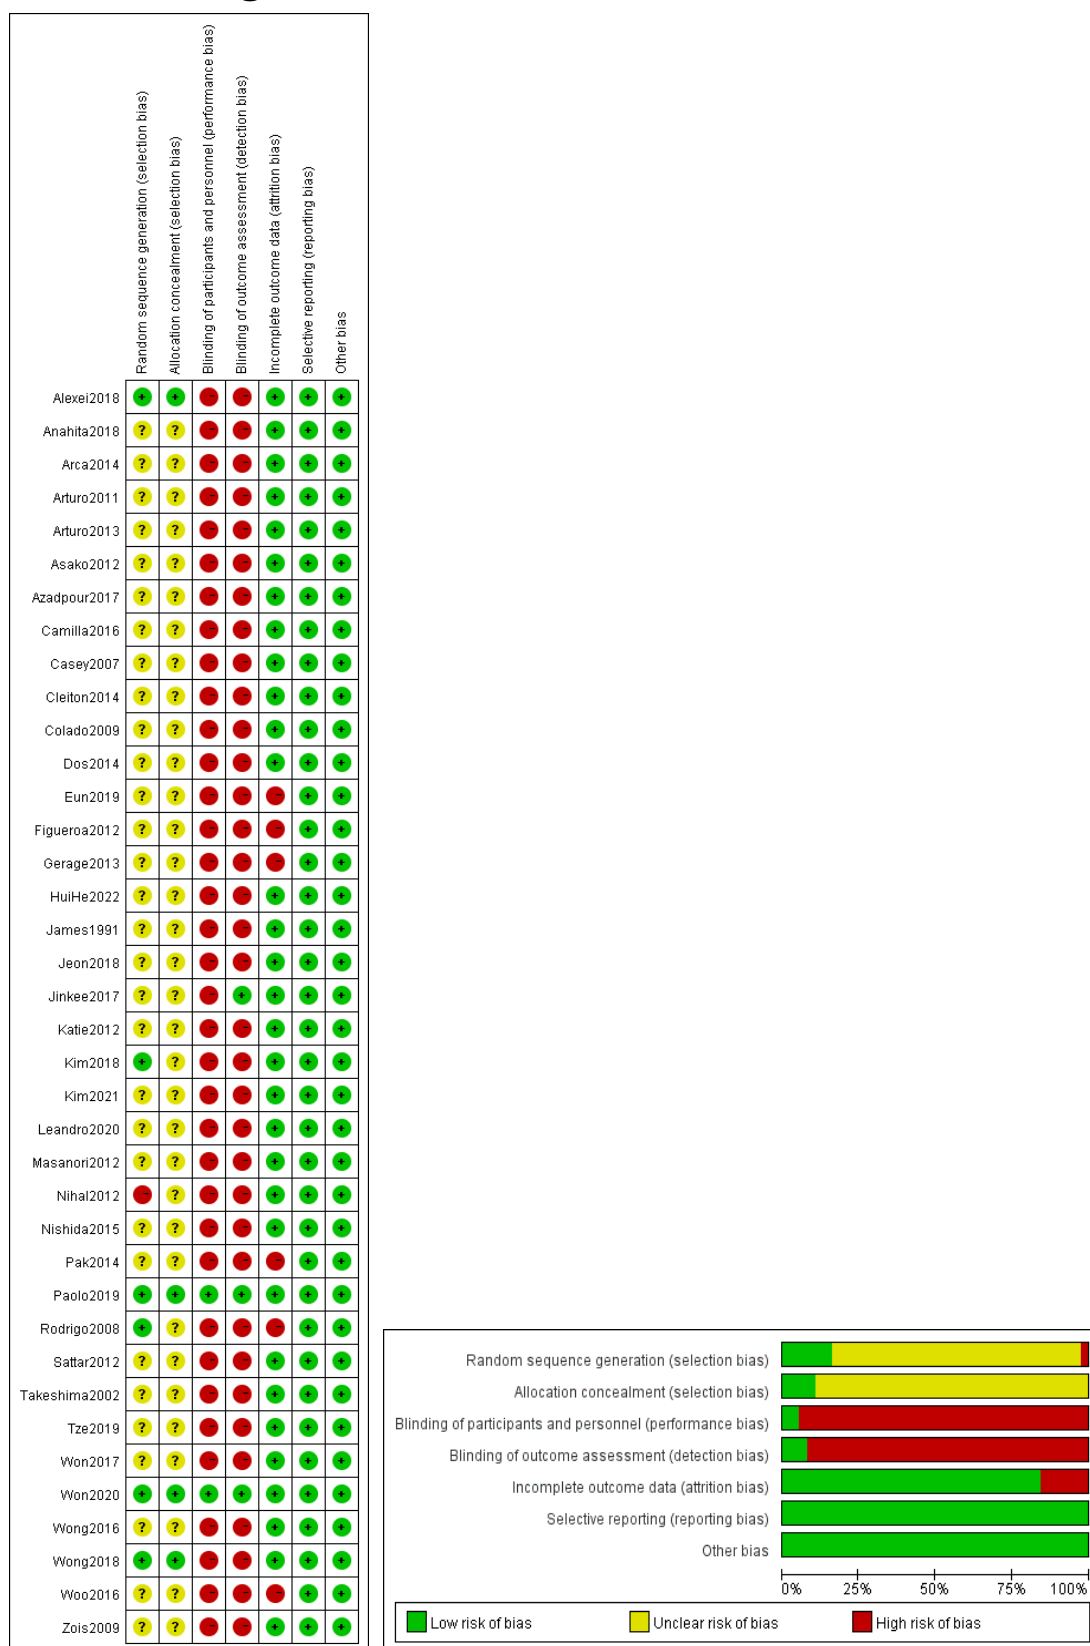



## Figure S2 Pairwise Meta-analysis of exercise on PWV

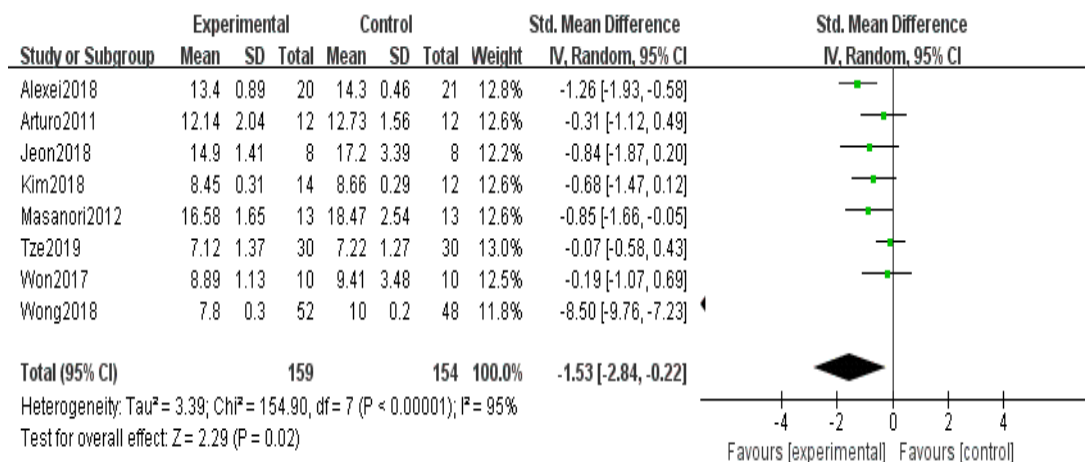

## Figure S3 Pairwise Meta-analysis of exercise on SBP

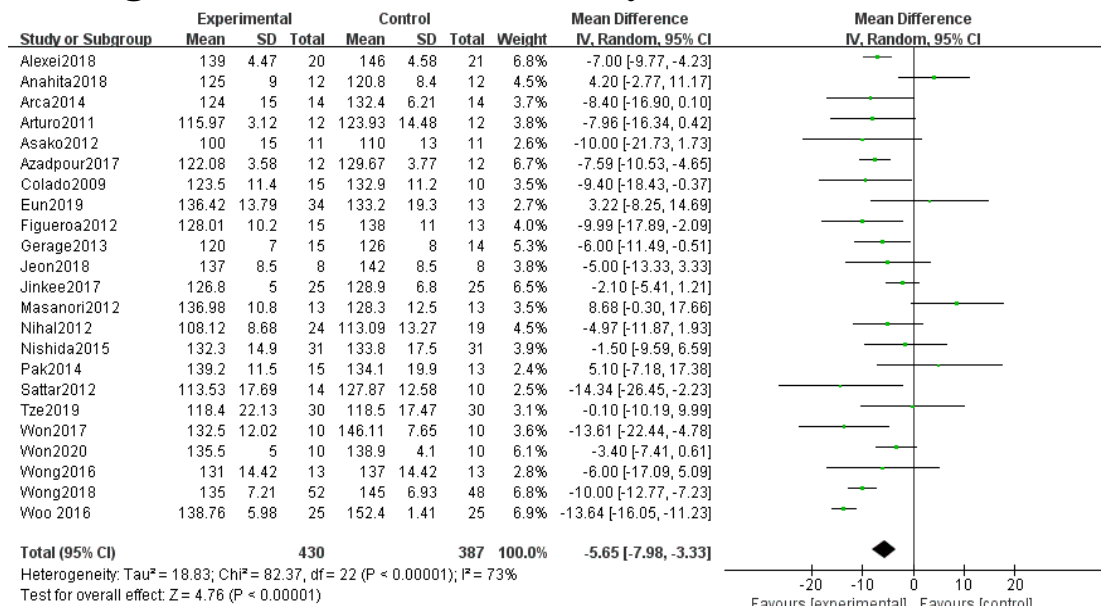

## Figure S4 Pairwise Meta-analysis of exercise on DBP

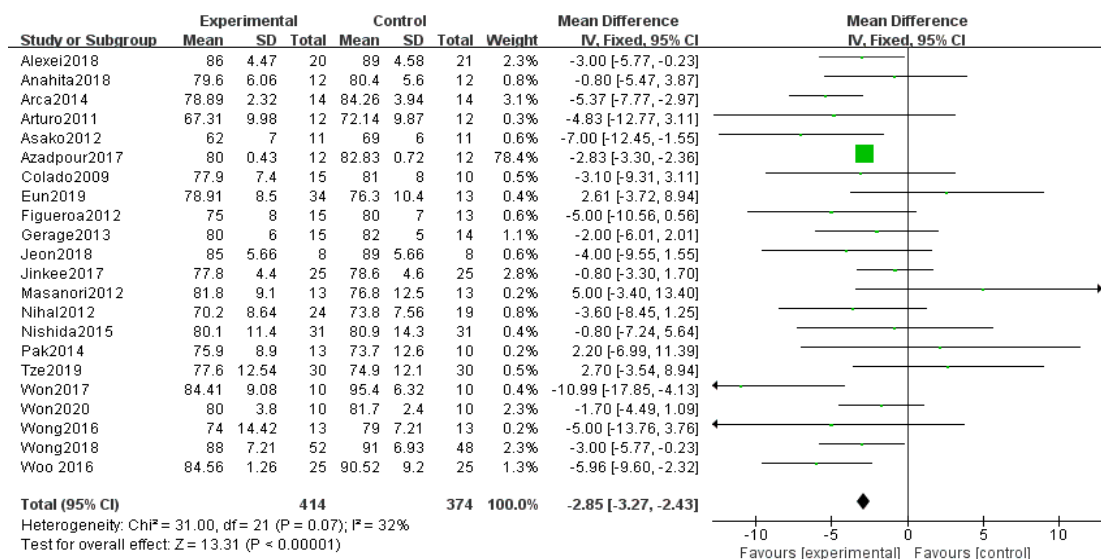

## Figure S5 Pairwise Meta-analysis of exercise on TC

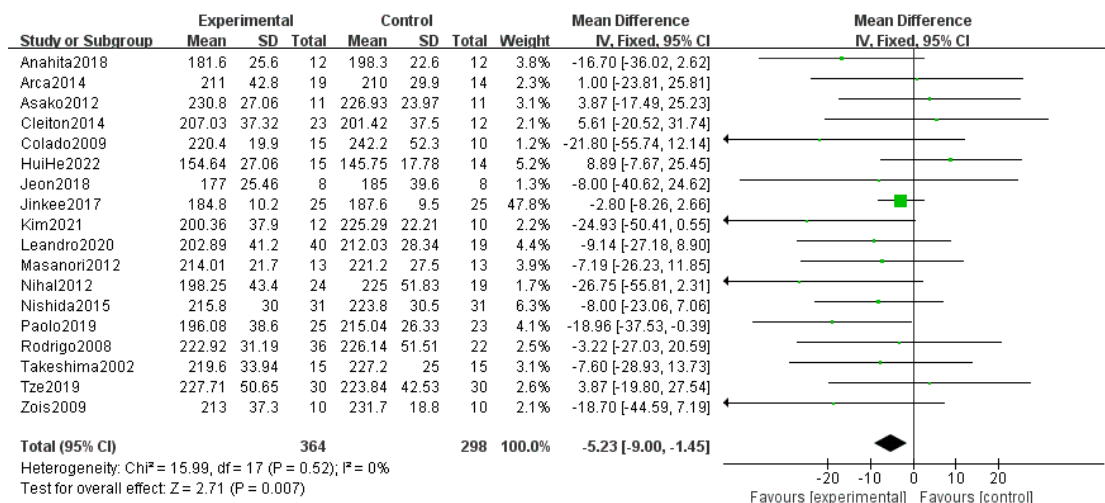

## Figure S6 Pairwise Meta-analysis of exercise on TG

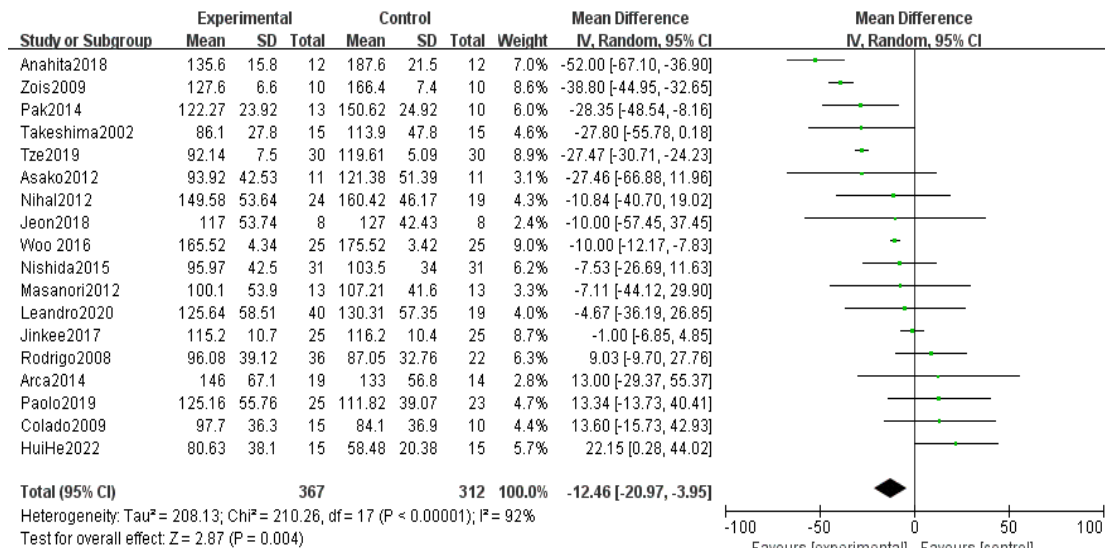

## Figure S7 Pairwise Meta-analysis of exercise on LDL-C

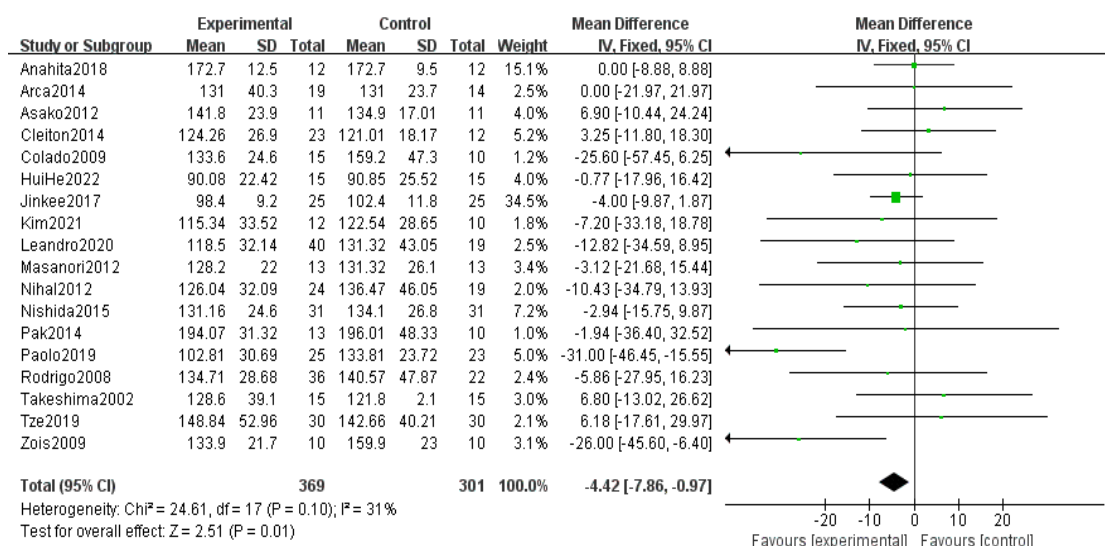

# Figure S8 Pairwise Meta-analysis of exercise on HDL-C

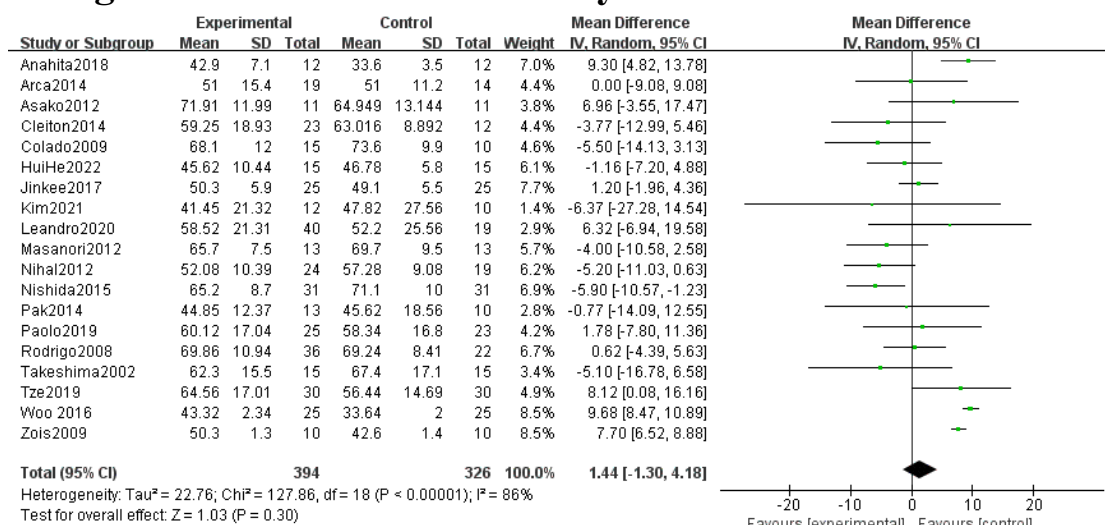

**Figure S9 Cumulative ranking probability plots for SBP**

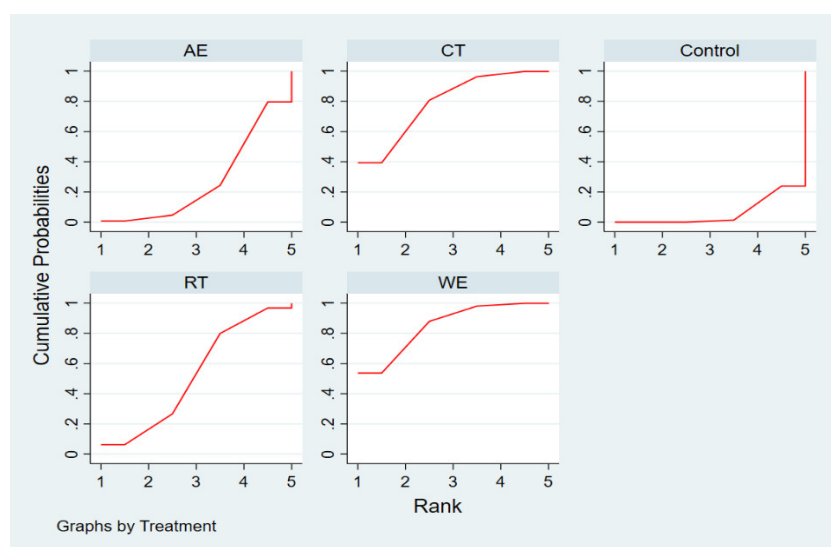

**Figure S10 Cumulative ranking probability plots for DBP**

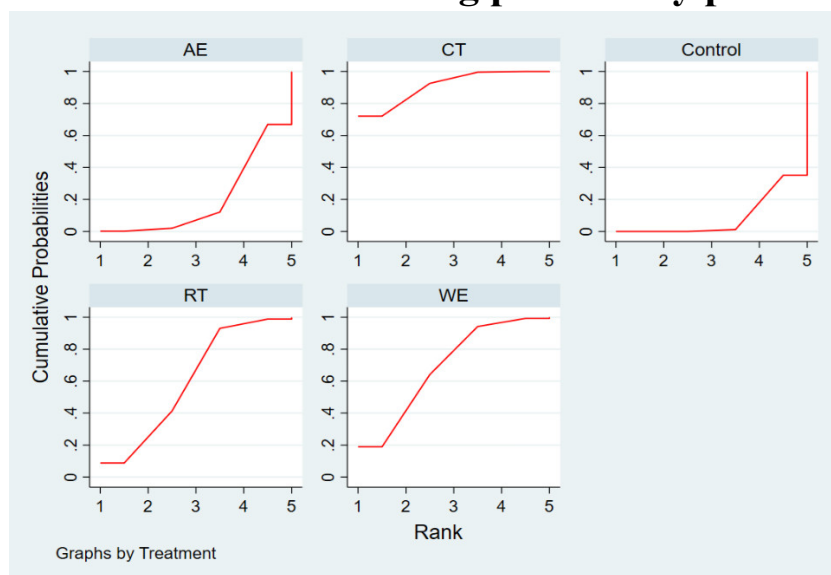

**Figure S11 Cumulative ranking probability plots for TC**

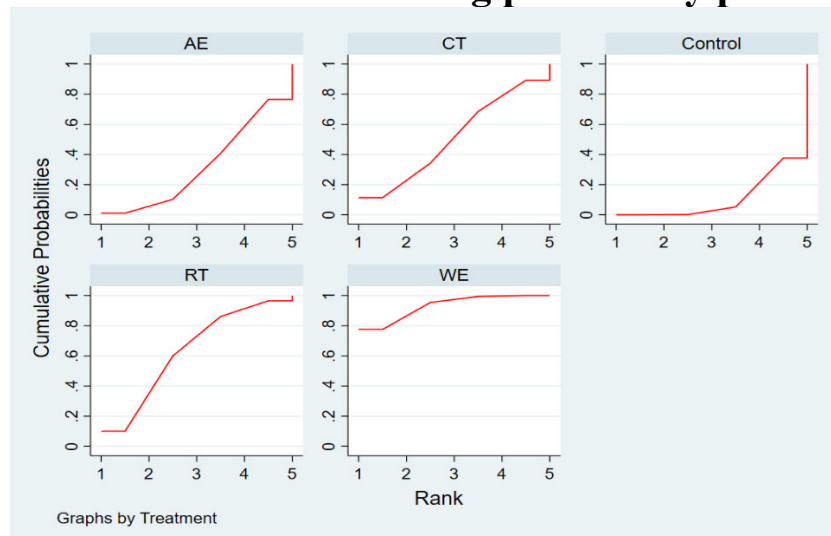

**Figure S12 Cumulative ranking probability plots for TG**

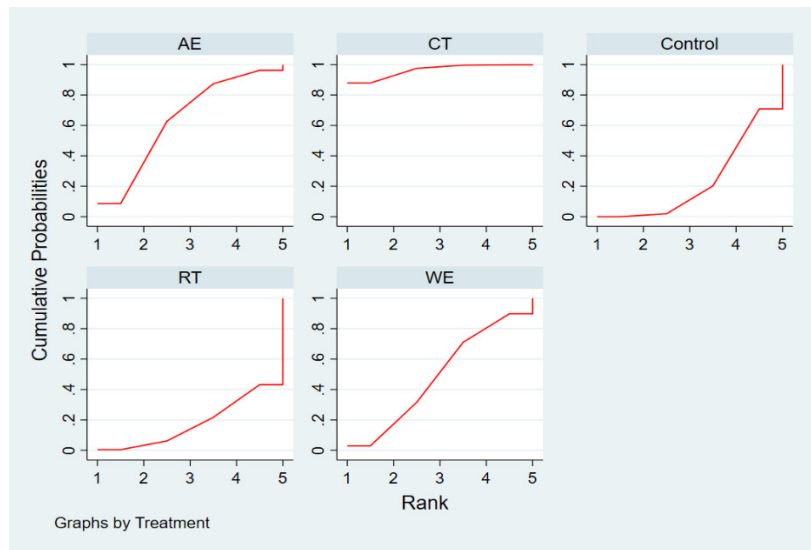

**Figure S13 Cumulative ranking probability plots for LDL-C**

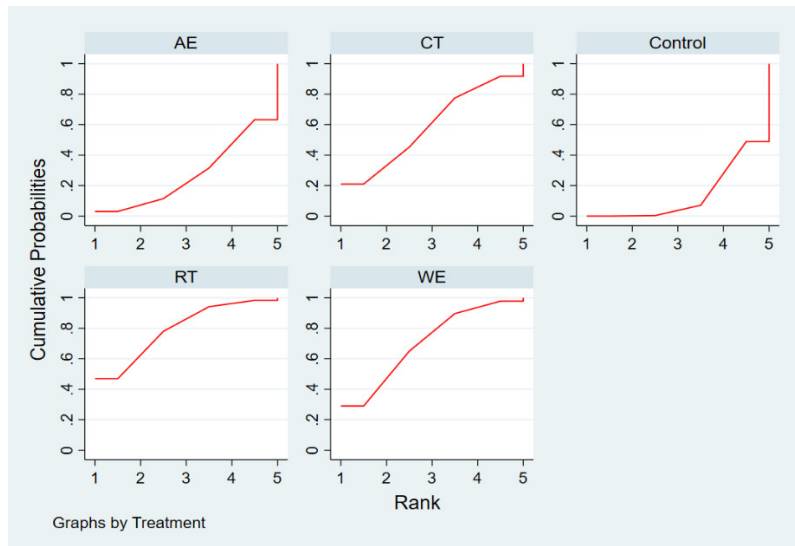

**Figure S14 Cumulative ranking probability plots for HDL-C**

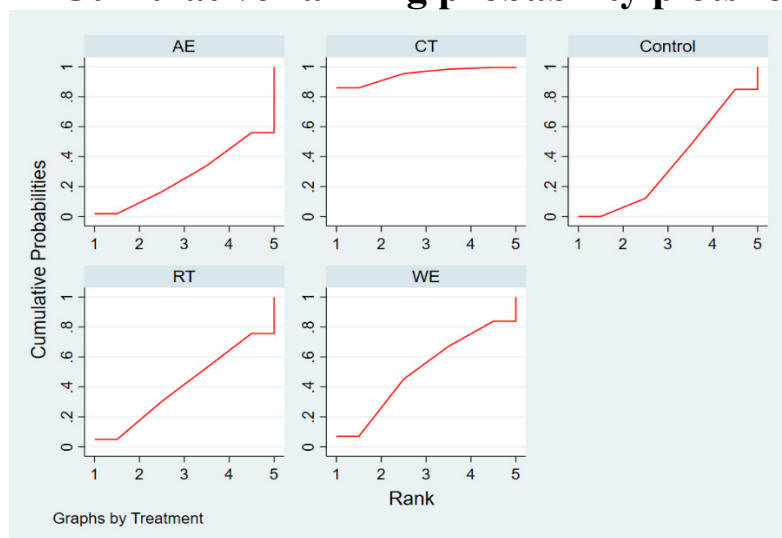

**Figure S15 Network meta-analysis funnel plots for SBP**

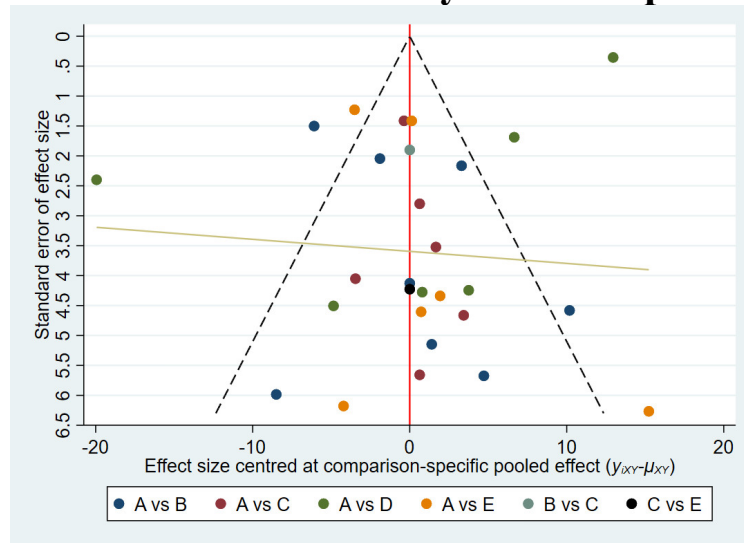

**Figure S16 Network meta-analysis funnel plots for DBP**

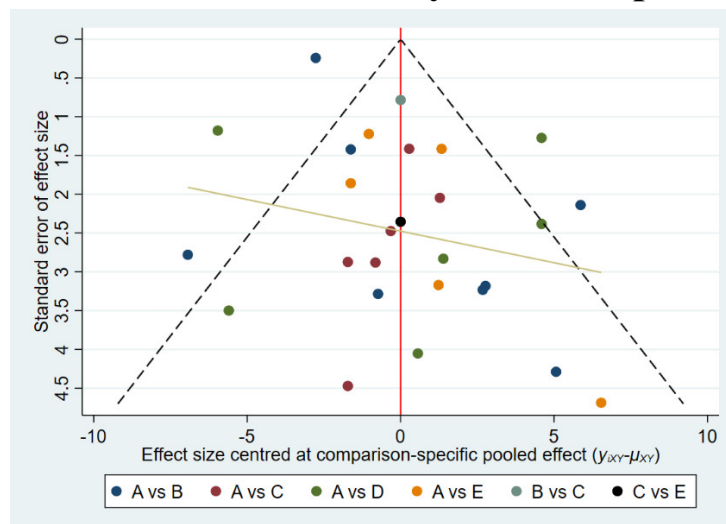

**Figure S17 Network meta-analysis funnel plots for TC**

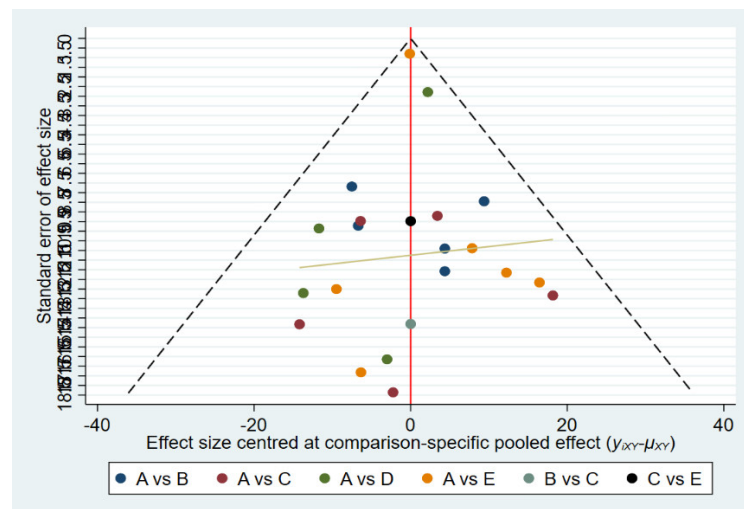

Figure S18 Network meta-analysis funnel plots for TG

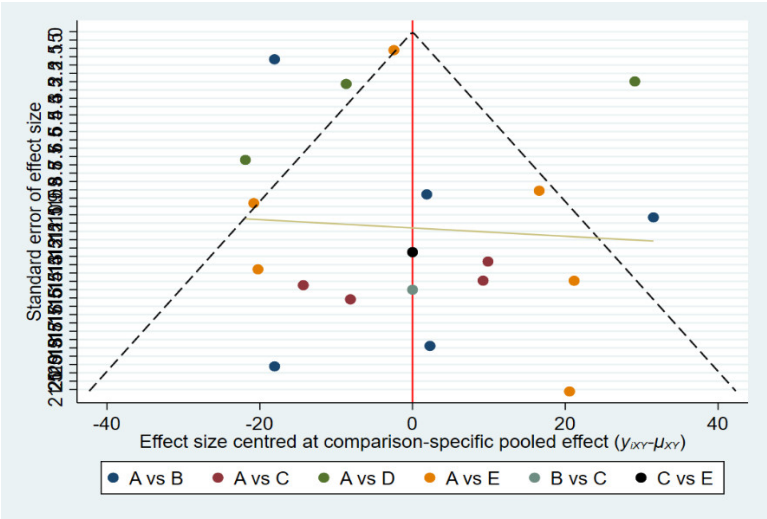

Figure S19 Network meta-analysis funnel plots for LDL-C

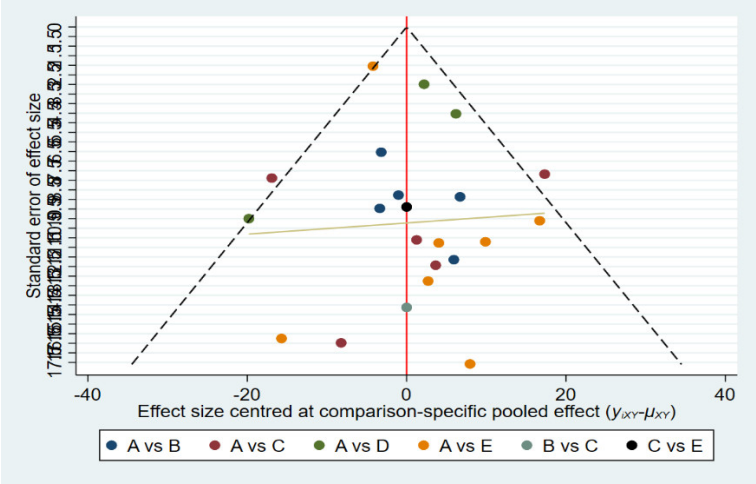

Figure S20 Network meta-analysis funnel plots for HDL-C

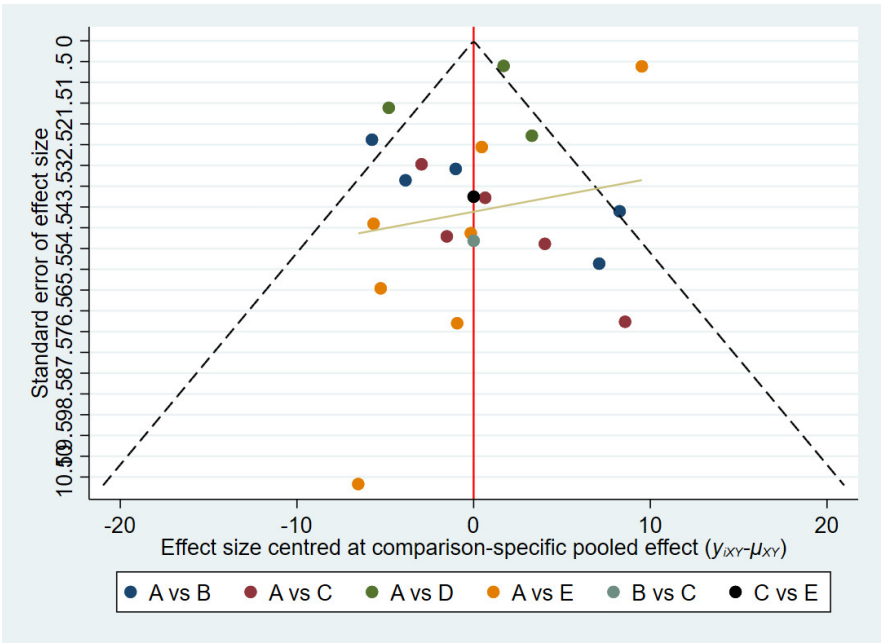

Supplement: s1 [file s1]
